# Supplementary material for: Niche partitioning between planktivorous fish in the pelagic Baltic Sea assessed by DNA metabarcoding, qPCR and microscopy
Source: PubMed Central journal article supplement (PMC9242992; doi:10.1038/s41598-022-15116-7), 2022-06-29
Supplement: 41598_2022_15116_MOESM1_ESM.pdf [file 41598_2022_15116_MOESM1_ESM.pdf]

# **Niche partitioning between planktivorous fish in the pelagic Baltic Sea assessed by DNA metabarcoding, qPCR and microscopy**

## **Supplementary material**

Andreas Novotny<sup>1,3,4</sup>, Kinlan Mehdi Goulwen Jan<sup>1,4,\*</sup>, Jan Dierking<sup>2</sup>, and Monika Winder<sup>1</sup>

<sup>1</sup>Department of Ecology, Environment, and Plant Sciences, Stockholm University, Stockholm, Sweden.

<sup>2</sup>GEOMAR, Helmholtz Centre for Ocean Research Kiel, Kiel, Germany.

<sup>3</sup>Present address: Institute for the Oceans and Fisheries, The University of British Columbia, Vancouver, Canada.

<sup>4</sup>These authors contributed equally: Andreas Novotny and Kinlan Mehdi Goulwen Jan

\*email: kinlan.jan@su.se

# Content

## Supplementary figures

*Supplementary Figure S1.* \_\_\_\_\_ 3

*Supplementary Figure S2.* \_\_\_\_\_ 4

*Supplementary Figure S3.* \_\_\_\_\_ 5

## Supplementary tables

*Supplementary Table S1.* \_\_\_\_\_ 6

*Supplementary Table S2.* \_\_\_\_\_ 7

*Supplementary Table S3.* \_\_\_\_\_ 7

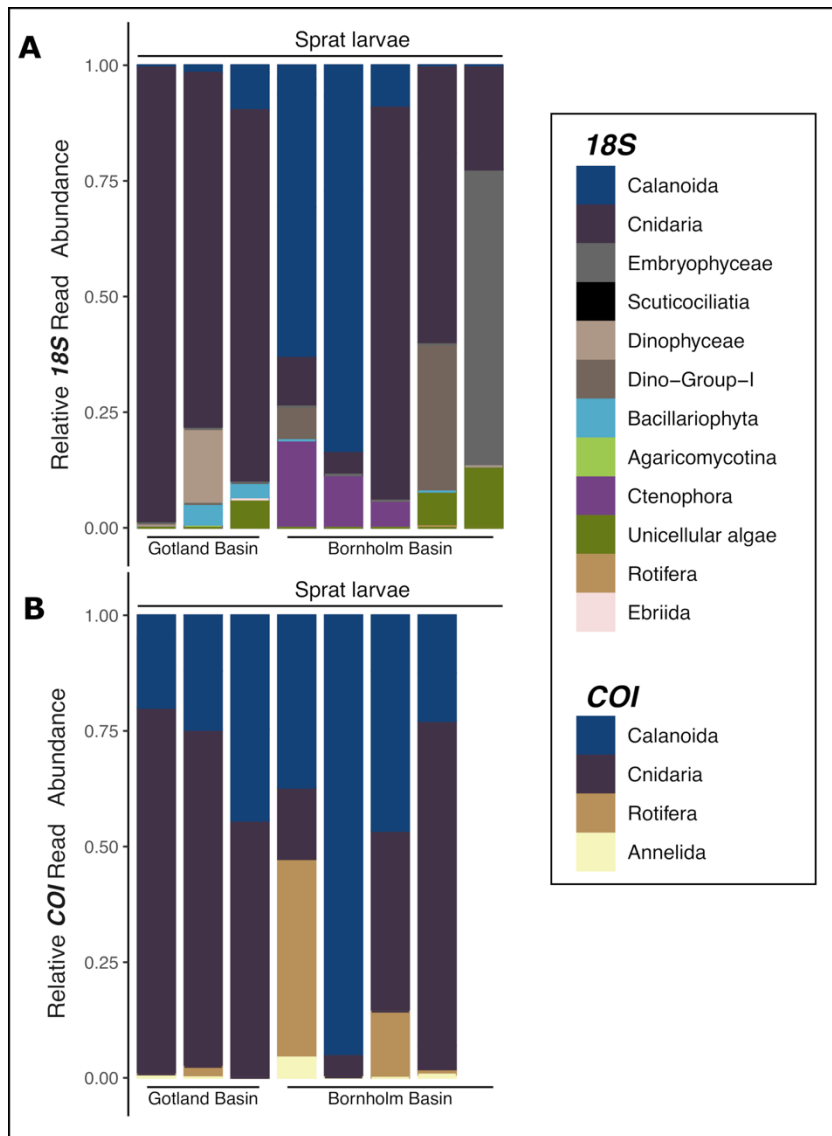

Supplementary Figure S1. Prey composition of the larval fish species sprat (*Sprattus sprattus*) shown as relative abundance of A) *18S rRNA* and B) *COI* sequence count per prey taxa. The bars represent unique biological replicates.

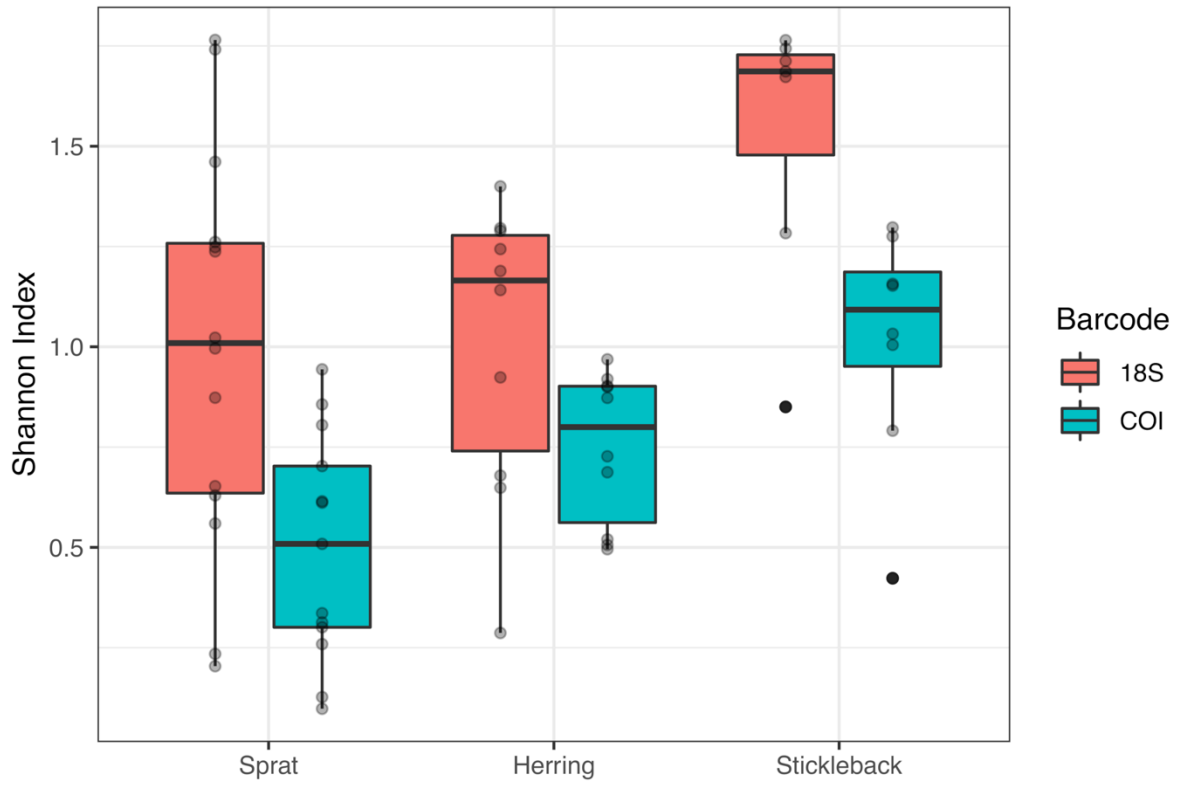

Supplementary Figure S2. Alpha diversity (Shannon Index) of prey communities for all fish species based on the *18S* and *COI* barcodes.

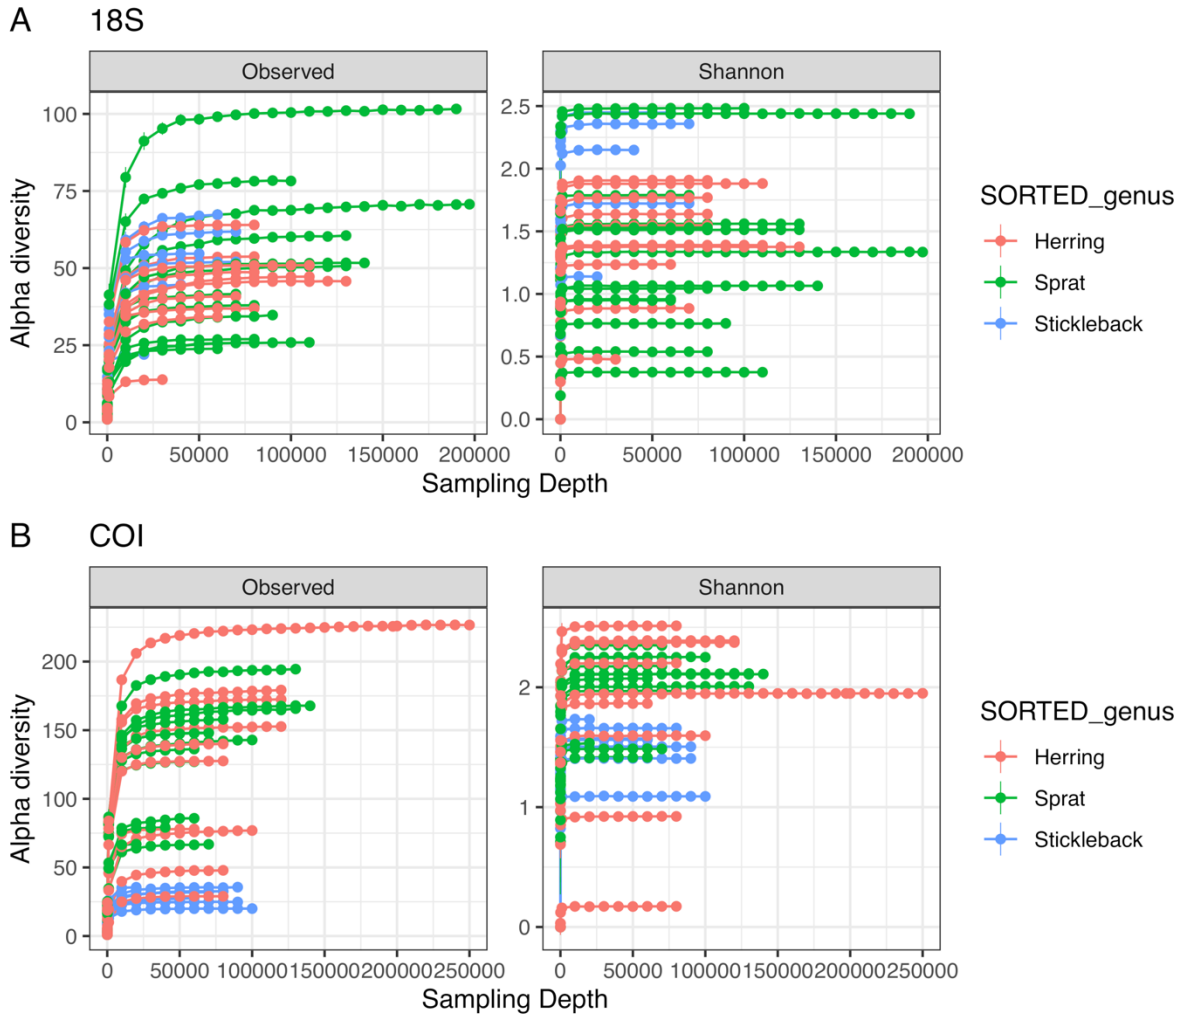

Supplementary Figure S3. Rarefaction curves showing the observed alpha diversity (left) and Shannon index (right) for *18S* (A) and *COI* (B).

Supplementary Table S1. Beta regression output for the prey contributing to more than 70% of the Bray-Curtis distance between all fish species. P values < 0.05 are shown in bold.

| Gene region | Prey                 | Pairs                 | Estimate             | SE   | Z ratio | P value                      |
|-------------|----------------------|-----------------------|----------------------|------|---------|------------------------------|
| <i>18S</i>  | <i>Pseudocalanus</i> | Herring – Sprat       | -0.067               | 0.1  | -0.667  | 0.7824                       |
|             |                      | Herring – Stickleback | 0.453                | 0.09 | 5.121   | <b>9.08 10<sup>-7</sup></b>  |
|             |                      | Sprat – Stickleback   | 0.519                | 0.08 | 6.724   | <b>5.32 10<sup>-11</sup></b> |
|             | Rotifers             | Herring – Sprat       | -0.004               | 0.01 | -0.416  | 0.909                        |
|             |                      | Herring – Stickleback | -0.314               | 0.05 | -6.311  | <b>8.32 10<sup>-10</sup></b> |
|             |                      | Sprat – Stickleback   | -0.31                | 0.05 | -6.231  | <b>1.39 10<sup>-9</sup></b>  |
|             | <i>Temora</i>        | Herring – Sprat       | 0.028                | 0.04 | 0.785   | 0.713                        |
|             |                      | Herring – Stickleback | -0.161               | 0.07 | -2.454  | <b>0.038</b>                 |
|             |                      | Sprat – Stickleback   | -0.189               | 0.06 | -3.056  | <b>0.0064</b>                |
|             | <i>Mertensia</i>     | Herring – Sprat       | -0.027               | 0.04 | -0.616  | 0.812                        |
|             |                      | Herring – Stickleback | 0.029                | 0.04 | 0.673   | 0.779                        |
|             |                      | Sprat – Stickleback   | 0.056                | 0.04 | 1.309   | 0.39                         |
| <i>COI</i>  | <i>Pseudocalanus</i> | Herring – Sprat       | -0.193               | 0.08 | -2.334  | 0.051                        |
|             |                      | Herring – Stickleback | 0.464                | 0.08 | 5.722   | <b>3.16 10<sup>-8</sup></b>  |
|             |                      | Sprat – Stickleback   | 0.657                | 0.07 | 9.862   | <b>2.84 10<sup>-14</sup></b> |
|             | <i>Synchaeta</i>     | Herring – Sprat       | 5.1 10 <sup>-5</sup> | 0.02 | 0.002   | 0.999                        |
|             |                      | Herring – Stickleback | -0.341               | 0.07 | -4.753  | <b>5.97 10<sup>-6</sup></b>  |
|             |                      | Sprat – Stickleback   | -0.341               | 0.07 | -4.769  | <b>5.54 10<sup>-6</sup></b>  |

Supplementary Table S2. Pairwise permANOVAs of Bray-Curtis distances among fish gut content based on the *18S* and *COI* gene regions.

| Gene region | Pairs                 | df   | F      | R <sup>2</sup> | P values     |
|-------------|-----------------------|------|--------|----------------|--------------|
| <i>18S</i>  | Sprat -Herring        | 1;22 | 0.225  | 0.010          | 0.822        |
|             | Sprat – Stickleback   | 1;19 | 26.455 | 0.582          | <b>0.001</b> |
|             | Herring - Stickleback | 1;15 | 16.502 | 0.524          | <b>0.001</b> |
| <i>COI</i>  | Sprat -Herring        | 1;21 | 1.754  | 0.077          | 0.187        |
|             | Sprat – Stickleback   | 1;19 | 29.853 | 0.611          | <b>0.001</b> |
|             | Herring - Stickleback | 1;16 | 14.551 | 0.476          | <b>0.001</b> |

Supplementary Table S3. Fish trawl sampling information, including site, date and time, depth and sample size (n) for each fish species (herring, sprat, and stickleback) and methodological approach (metabarcoding, qPCR, and microscopy).

| STATION ID<br>Basin name  | Latitude<br>Longitude    | Date<br>Start-Stop        | Sampling<br>depth (m) | Metabarcoding<br>(n) |       |             | qPCR<br>(n) |       |             | Microscopy<br>(n) |       |             |
|---------------------------|--------------------------|---------------------------|-----------------------|----------------------|-------|-------------|-------------|-------|-------------|-------------------|-------|-------------|
|                           |                          |                           |                       | Herring              | Sprat | Stickleback | Herring     | Sprat | Stickleback | Herring           | Sprat | Stickleback |
| BB07<br>Bornholm<br>Basin | 55°37.10'N<br>16°00.15'E | 2019-04-25<br>13:34-14:00 | 73                    | 2                    | 4     | 0           | 2           | 4     | 0           | 1                 | 3     | 0           |
| BB40<br>Bornholm<br>Basin | 54°47.91'N<br>15°29.76'E | 2019-04-28<br>10:06-10:28 | 74                    | 4                    | 4     | 0           | 3           | 4     | 0           | 3                 | 4     | 0           |
| GB79<br>Gotland Basin     | 55°58.87'N<br>18°59.50'E | 2019-04-22<br>13:07-13:45 | 75                    | 0                    | 2     | 0           | 0           | 4     | 0           | 0                 | 2     | 0           |
| GB82<br>Gotland Basin     | 55°52.46'N<br>18°10.92'E | 2019-04-22<br>06:18-06:48 | 63                    | 0                    | 0     | 7           | 0           | 0     | 4           | 0                 | 0     | 6           |
| H22<br>Arkona Basin       | 54°56.01'N<br>13°14.78'E | 2019-04-18<br>14:05-14:35 | 47                    | 4                    | 4     | 0           | 4           | 4     | 0           | 2                 | 4     | 0           |
